# Supplementary material for: Choroidal Thickening During Young Adulthood and Baseline Choroidal Thickness Predicts Refractive Error Change
Source: PubMed Central journal article supplement (PMC9150825; doi:10.1167/iovs.63.5.34), 2022-05-26
Supplement: iovs-63-5-34_s002.pdf [file iovs-63-5-34_s002.pdf]

**Supplementary Table.** Change in choroidal thickness with age and axial length at the 8 non-central Early Treatment of Diabetic Retinopathy Study regions<sup>a</sup>

| Measure                       | Estimate [95%CI]     | Statistical outcome <sup>b</sup>      |
|-------------------------------|----------------------|---------------------------------------|
| <b>Region: Inner superior</b> |                      |                                       |
| Age (year)                    | 1.5 [0.7 to 2.3]     | F <sub>1,557</sub> = 12.6; p< 0.001** |
| Axial length (mm)             | -16.6 [-38.6 to 5.4] | F <sub>1,701</sub> = 2.2; p= 0.14     |
| Age × axial length            | -1.0 [-1.8 to -0.2]  | F <sub>1,540</sub> = 6.5; p= 0.011*   |
| <b>Region: Inner inferior</b> |                      |                                       |
| Age (year)                    | 1.5 [0.8 to 2.3]     | F <sub>1,559</sub> = 15.0; p< 0.001** |
| Axial length (mm)             | -8.4 [-29.8 to 13.0] | F <sub>1,703</sub> = 0.6; p= 0.44     |
| Age × axial length            | -1.5 [-2.3 to -0.7]  | F <sub>1,540</sub> = 14.8; p< 0.001** |
| <b>Region: Inner temporal</b> |                      |                                       |
| Age (year)                    | 0.0 [-0.8 to 0.8]    | F <sub>1,566</sub> = 0.0; p= 0.94     |
| Axial length (mm)             | -18.8 [-40.3 to 2.8] | F <sub>1,715</sub> = 2.9; p= 0.09     |
| Age × axial length            | -0.8 [-1.5 to 0.0]   | F <sub>1,553</sub> = 3.8; p= 0.05     |
| <b>Region: Inner nasal</b>    |                      |                                       |
| Age (year)                    | 1.8 [1.0 to 2.6]     | F <sub>1,567</sub> = 19.7; p< 0.001** |
| Axial length (mm)             | -16.2 [-39.3 to 6.9] | F <sub>1,717</sub> = 1.9; p= 0.17     |
| Age × axial length            | -1.2 [-2.0 to -0.4]  | F <sub>1,553</sub> = 8.9; p= 0.003**  |
| <b>Region: Outer superior</b> |                      |                                       |
| Age (year)                    | 1.1 [0.3 to 2.0]     | F <sub>1,552</sub> = 7.0; p= 0.008**  |
| Axial length (mm)             | -9.6 [-32.5 to 13.2] | F <sub>1,694</sub> = 0.7; p= 0.41     |
| Age × axial length            | -1.2 [-2.1 to -0.4]  | F <sub>1,537</sub> = 8.3; p= 0.004**  |
| <b>Region: Outer inferior</b> |                      |                                       |
| Age (year)                    | 0.4 [-0.7 to 1.5]    | F <sub>1,552</sub> = 0.5; p= 0.46     |
| Axial length (mm)             | 9.5 [-18.4 to 37.3]  | F <sub>1,674</sub> = 0.4; p= 0.51     |
| Age × axial length            | -1.9 [-3.0 to -0.8]  | F <sub>1,543</sub> = 11.9; p= 0.001** |
| <b>Region: Outer temporal</b> |                      |                                       |
| Age (year)                    | -1.2 [-1.9 to -0.5]  | F <sub>1,565</sub> = 11.3; p= 0.001** |
| Axial length (mm)             | -18.6 [-38.4 to 1.2] | F <sub>1,716</sub> = 3.4; p= 0.07     |
| Age × axial length            | -0.6 [-1.3 to 0.1]   | F <sub>1,552</sub> = 2.9; p= 0.09     |
| <b>Region: Outer nasal</b>    |                      |                                       |
| Age (year)                    | 0.0 [-0.7 to 0.7]    | F <sub>1,568</sub> = 0.0; p= 0.97     |

---

|                    |                       |                                     |
|--------------------|-----------------------|-------------------------------------|
| Axial length (mm)  | -21.0 [-41.1 to -0.8] | F <sub>1,718</sub> = 4.2; p= 0.042* |
| Age × axial length | -0.8 [-1.5 to -0.2]   | F <sub>1,550</sub> = 6.0; p= 0.015* |

---

<sup>a</sup> Inner rings: between 0.5 and 1.5mm radius around the fovea, outer rings: between 1.5 and 3.0mm radius around the fovea; <sup>b</sup> corrected for sex and ethnicity.

CI= confidence interval

Statistical significance at \*p< 0.05 and \*\*< 0.01
